# Supplementary material for: First-principle calculations study of the ORR/OER electrocatalytic activity of ruthenium polyphthalocyanine axially modified with aliphatic thiol groups
Source: Royal Society of Chemistry journal article supplement (doi:10.1039/d4cp00424h), 2024-01-01
Supplement: d4cp00424h1.pdf [file d4cp00424h1.pdf]

## Supporting Information

### **Theoretical investigation of electrocatalytic activity of oxygen evolution/reduction reactions of ruthenium polyphthalocyanine axially modified with aliphatic thiols**

Guilin Wang<sup>a,b</sup>, Xiaoqin Feng<sup>a</sup>, Rongrong Ren<sup>a</sup>, Yuxin Wang<sup>a</sup>, Jie Meng<sup>a</sup>, Jianfeng Jia<sup>a,\*</sup>

<sup>a</sup>Key Laboratory of Magnetic Molecules and Magnetic Information Materials (Ministry of Education), School of Chemistry and Material Science, Shanxi Normal University, Taiyuan 030031, China

<sup>b</sup>Department of Physics and Electronic Engineering, Yuncheng University, Yuncheng 044000, China

E-mail: [jjajf@dns.sxnu.edu.cn](mailto:jjajf@dns.sxnu.edu.cn)

**Table S1.** The lattice parameters (in Å or °) of cell of RuPPc and RuPPc-SR. Average bond length of Ru-N bond ( $b_{\text{Ru-N}}$ , in Å) of RuPPc and RuPPc-SR.

| Structure                             | Lattice parameter |       |              |             |              | $b_{\text{Ru-N}}$<br>(Å) |
|---------------------------------------|-------------------|-------|--------------|-------------|--------------|--------------------------|
|                                       | a (Å)             | b (Å) | $\alpha$ (°) | $\beta$ (°) | $\gamma$ (°) |                          |
| RuPPc                                 | 10.73             | 10.73 | 90.00°       | 90.00°      | 90.00°       | 1.99                     |
| RuPPc-SCH <sub>3</sub>                | 10.74             | 10.75 | 90.39°       | 88.39°      | 90.15°       | 2.00                     |
| RuPPc-SC <sub>2</sub> H <sub>5</sub>  | 10.73             | 10.75 | 90.64°       | 89.21°      | 90.04°       | 2.01                     |
| RuPPc-SC <sub>3</sub> H <sub>7</sub>  | 10.74             | 10.74 | 93.45°       | 90.92°      | 89.90°       | 2.00                     |
| RuPPc-SC <sub>4</sub> H <sub>9</sub>  | 10.76             | 10.72 | 89.38°       | 91.22°      | 90.04°       | 2.00                     |
| RuPPc-SC <sub>5</sub> H <sub>11</sub> | 10.73             | 10.73 | 90.45°       | 92.41°      | 90.02°       | 2.00                     |
| RuPPc-SC <sub>6</sub> H <sub>13</sub> | 10.73             | 10.73 | 90.90°       | 95.00°      | 90.00°       | 2.00                     |

The Pourbaix plots can be used to analyze the stability of different phases of catalyst under different H<sup>+</sup> concentration and potential conditions.<sup>1,2</sup> We constructed surface Pourbaix plots using the ground state energies, ZPE, and entropic contributions for RuPPc/RuPPc-SR, H-RuPPc/H-RuPPc-SR, and HO-RuPPc/HO-RuPPc-SR systems at standard conditions and at 298 K. Considered surface processes<sup>2</sup> include:

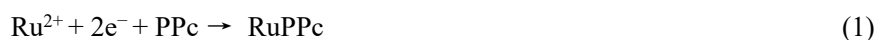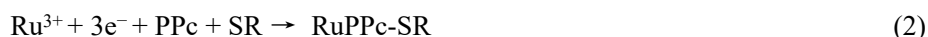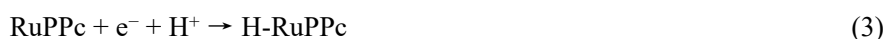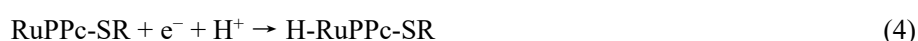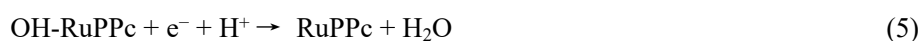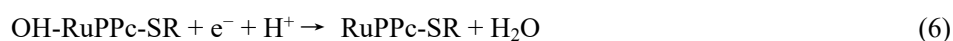

According to the above electrode reaction equations (1)-(6), the following Nernst equations can be established:

$$E(\text{Ru}^{2+}/\text{RuPPc}) = E^0(\text{Ru}^{2+}/\text{RuPPc}) - 0.0592/2 \times \log a(\text{Ru}^{2+}) \quad (7)$$

$$E(\text{Ru}^{3+}/\text{RuPPc-SR}) = E^0(\text{Ru}^{3+}/\text{RuPPc-SR}) - 0.0592/3 \times \log a(\text{Ru}^{3+}) \quad (8)$$

$$E(\text{RuPPc}/\text{H-RuPPc}) = E^0(\text{RuPPc}/\text{H-RuPPc}) - 0.0592 \times \text{pH} \quad (9)$$

$$E(\text{RuPPc-SR}/\text{H-RuPPc-SR}) = E^0(\text{RuPPc-SR}/\text{H-RuPPc-SR}) - 0.0592 \times \text{pH} \quad (10)$$

$$E(\text{HO-RuPPc}/\text{RuPPc}) = E^0(\text{HO-RuPPc}/\text{RuPPc}) - 0.0592 \times \text{pH} \quad (11)$$

$$E(\text{HO-RuPPc-SR}/\text{RuPPc-SR}) = E^0(\text{HO-RuPPc-SR}/\text{RuPPc-SR}) - 0.0592 \times \text{pH} \quad (12)$$

Where  $E^0$  is the standard equilibrium potential. The equilibrium potential (E) in the pH range of 0 ~ 14 is calculated by equations (7)-(12). The activity (a) of Ru<sup>2+</sup> and Ru<sup>3+</sup> ions were taken to be  $1 \times 10^{-8} \text{ mol dm}^{-3}$ .<sup>2,3</sup> The calculated standard potentials for reactions at standard conditions, 298 K, pH = 0 are summarized in Table S2. Pourbaix plots were constructed for the RuPPc and RuPPc-SC<sub>4</sub>H<sub>9</sub> as shown in Fig. 4, and for the other RuPPc-SR are shown in Fig. S4.

**Table S2.** Calculated standard potentials for reactions based on the equations (1) to (6), at standard conditions, 298 K, pH = 0.

| Structure                             | $z$ | $E^\theta(\text{Ru}^{2+}/\text{RuPPc})/$<br>$E^\theta(\text{Ru}^{3+}/\text{RuPPc-SR})$ | $E^\theta(\text{RuPPc}/\text{H-RuPPc})/$<br>$E^\theta(\text{RuPPc-SR}/\text{H-RuPPc-SR})$ | $E^\theta(\text{HO-RuPPc}/\text{RuPPc})/$<br>$E^\theta(\text{HO-RuPPc-SR}/\text{RuPPc-SR})$ |
|---------------------------------------|-----|----------------------------------------------------------------------------------------|-------------------------------------------------------------------------------------------|---------------------------------------------------------------------------------------------|
| RuPPc                                 | 2   | 6.456                                                                                  | 0.437                                                                                     | 0.306                                                                                       |
| RuPPc-SCH <sub>3</sub>                | 3   | 3.180                                                                                  | -0.761                                                                                    | 0.991                                                                                       |
| RuPPc-SC <sub>2</sub> H <sub>5</sub>  | 3   | 2.111                                                                                  | -0.758                                                                                    | 0.994                                                                                       |
| RuPPc-SC <sub>3</sub> H <sub>7</sub>  | 3   | 2.106                                                                                  | -0.710                                                                                    | 0.845                                                                                       |
| RuPPc-SC <sub>4</sub> H <sub>9</sub>  | 3   | 2.114                                                                                  | -0.830                                                                                    | 0.993                                                                                       |
| RuPPc-SC <sub>5</sub> H <sub>11</sub> | 3   | 2.113                                                                                  | -0.784                                                                                    | 0.844                                                                                       |
| RuPPc-SC <sub>6</sub> H <sub>13</sub> | 3   | 2.129                                                                                  | -1.152                                                                                    | 0.844                                                                                       |

**Table S3.** The adsorption free energies (unit: eV) of intermediates of ORR/OER of RuPPc and RuPPc-SR, which were calculated using the PBE and the PBE + U.

| Structure                             | PBE                                        |                                   |                                    |                            |                            | PBE+U                               |                                   |                                    |                            |                            |
|---------------------------------------|--------------------------------------------|-----------------------------------|------------------------------------|----------------------------|----------------------------|-------------------------------------|-----------------------------------|------------------------------------|----------------------------|----------------------------|
|                                       | $\Delta G_{\text{H}}^{*\text{OO}}$<br>(eV) | $\Delta G_{\text{O}}^{*}$<br>(eV) | $\Delta G_{\text{OH}}^{*}$<br>(eV) | $\eta^{\text{ORR}}$<br>(V) | $\eta^{\text{OER}}$<br>(V) | $\Delta G_{\text{OOH}}^{*}$<br>(eV) | $\Delta G_{\text{O}}^{*}$<br>(eV) | $\Delta G_{\text{OH}}^{*}$<br>(eV) | $\eta^{\text{ORR}}$<br>(V) | $\eta^{\text{OER}}$<br>(V) |
| RuPPc                                 | 3.183                                      | 1.045                             | 0.270                              | 0.960                      | 0.903                      | 3.592                               | 1.301                             | 0.547                              | 0.683                      | 1.061                      |
| RuPPc-SCH <sub>3</sub>                | 4.007                                      | 2.052                             | 0.977                              | 0.309                      | 0.721                      | 3.984                               | 2.247                             | 0.957                              | 0.294                      | 0.508                      |
| RuPPc-SC <sub>2</sub> H <sub>5</sub>  | 3.760                                      | 2.091                             | 0.863                              | 0.367                      | 0.435                      | 3.918                               | 2.277                             | 0.910                              | 0.320                      | 0.411                      |
| RuPPc-SC <sub>3</sub> H <sub>7</sub>  | 3.710                                      | 2.060                             | 0.835                              | 0.395                      | 0.416                      | 3.859                               | 2.256                             | 0.860                              | 0.370                      | 0.374                      |
| RuPPc-SC <sub>4</sub> H <sub>9</sub>  | 3.789                                      | 2.119                             | 0.993                              | 0.237                      | 0.436                      | 3.860                               | 2.294                             | 0.997                              | 0.233                      | 0.336                      |
| RuPPc-SC <sub>5</sub> H <sub>11</sub> | 3.981                                      | 2.067                             | 0.844                              | 0.386                      | 0.680                      | 4.034                               | 2.257                             | 0.964                              | 0.344                      | 0.547                      |
| RuPPc-SC <sub>6</sub> H <sub>13</sub> | 4.001                                      | 2.064                             | 0.846                              | 0.384                      | 0.703                      | 4.043                               | 2.256                             | 0.965                              | 0.353                      | 0.558                      |

**Table S4.**  $Q_{\text{Ru}}$  (unit: |e|),  $Q_{\text{N}}$  (unit: |e|), and  $Q_{\text{SR}}$  (unit: |e|) denote the Bader charge of the Ru atom, the four N atoms closest to the Ru atom and the aliphatic thiol groups in the RuPPc and RuPPc-SR, respectively.

| Structure                             | $Q_{\text{Ru}}( e )$ | $Q_{\text{N4}}( e )$ | $Q_{\text{SR}}( e )$ |
|---------------------------------------|----------------------|----------------------|----------------------|
| RuPPc                                 | 1.218                | -4.537               | ---                  |
| RuPPc-SCH <sub>3</sub>                | 1.028                | -4.518               | -0.038               |
| RuPPc-SC <sub>2</sub> H <sub>5</sub>  | 1.147                | -4.528               | -0.037               |
| RuPPc-SC <sub>3</sub> H <sub>7</sub>  | 1.081                | -4.535               | -0.041               |
| RuPPc-SC <sub>4</sub> H <sub>9</sub>  | 1.015                | -4.495               | -0.017               |
| RuPPc-SC <sub>5</sub> H <sub>11</sub> | 1.178                | -4.438               | -0.041               |
| RuPPc-SC <sub>6</sub> H <sub>13</sub> | 1.115                | -4.426               | -0.042               |

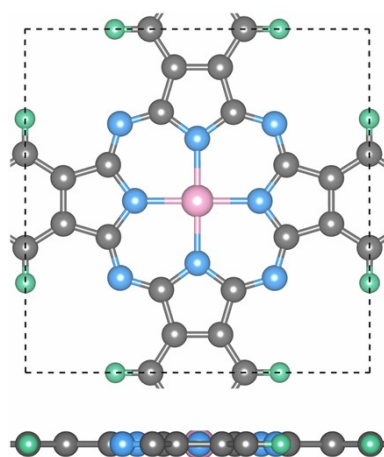

**FePPc**

**Fig.S1.** The top and side view of the unit cell of FePPc.

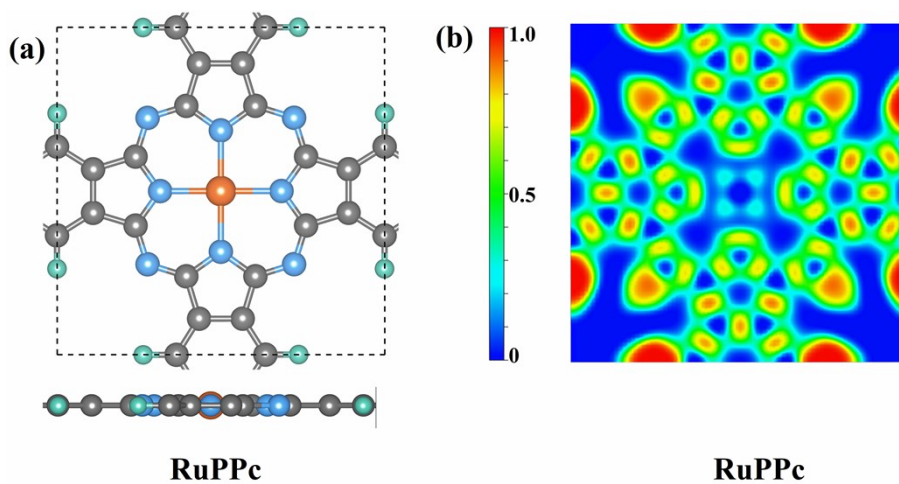

**RuPPc**

**RuPPc**

**Fig.S2.** (a)The top and side view of the unit cell of RuPPc. The green, gray, blue, yellow, and orange balls are H, C, N, S, and Ru atoms, respectively. (b) The Electron localization functions (ELFs) of the top and side view of the RuPPc..

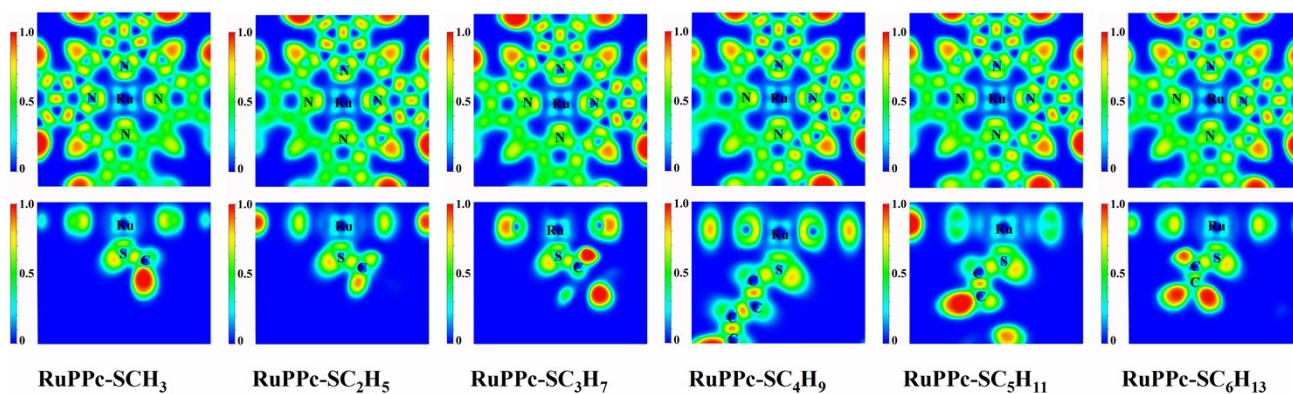

**Fig.S3.** The Electron localization functions (ELFs) of the top and side view of RuPPc-SR.

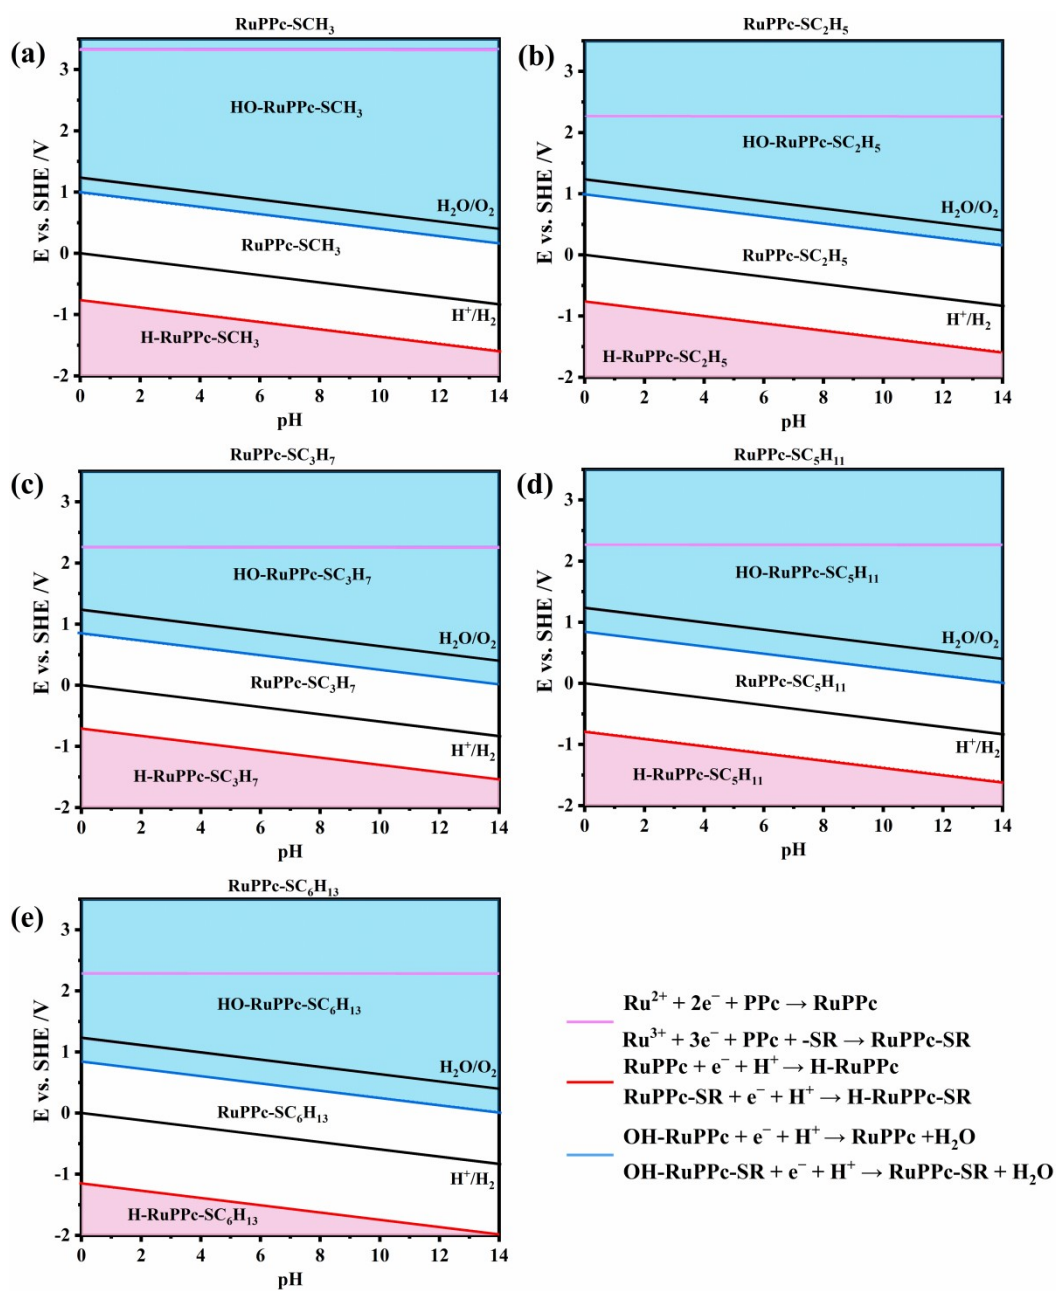

Fig.S4. Surface Pourbaix plots of RuPPc-SR. Thick black lines indicate the theoretical water stability region.



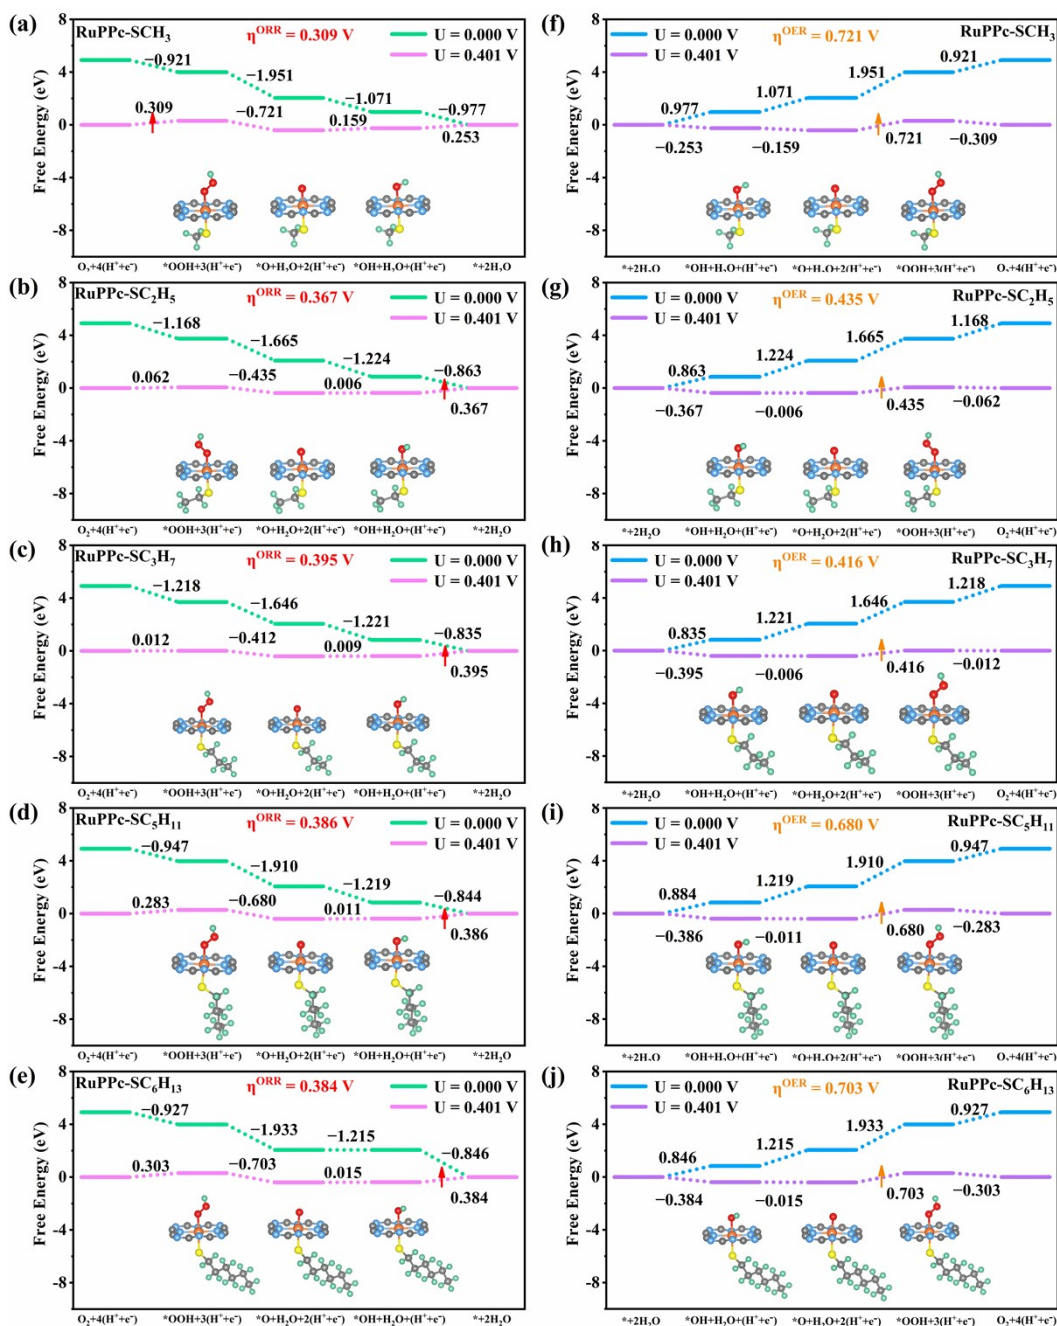

**Fig. S5.** (a)–(e) The ORR free energy diagrams of RuPPc-SR (SR = -SCH<sub>3</sub>, -SC<sub>2</sub>H<sub>5</sub>, -SC<sub>3</sub>H<sub>7</sub>, -SC<sub>5</sub>H<sub>11</sub>, and -SC<sub>6</sub>H<sub>13</sub>) at  $U = 0$  V, respectively. (f)–(j) The OER free energy diagrams of RuPPc and RuPPc-SR (SR = -SCH<sub>3</sub>, -SC<sub>2</sub>H<sub>5</sub>, -SC<sub>3</sub>H<sub>7</sub>, -SC<sub>5</sub>H<sub>11</sub>, and -SC<sub>6</sub>H<sub>13</sub>) at  $U = 0$  V, respectively. The red and orange upward arrows present the potential-determination step (PDS) of ORR and OER, respectively. The configurations of the reaction intermediates are also shown. The green, gray, blue, red, yellow, and orange balls are H, C, N, O, S, and Ru atoms, respectively.

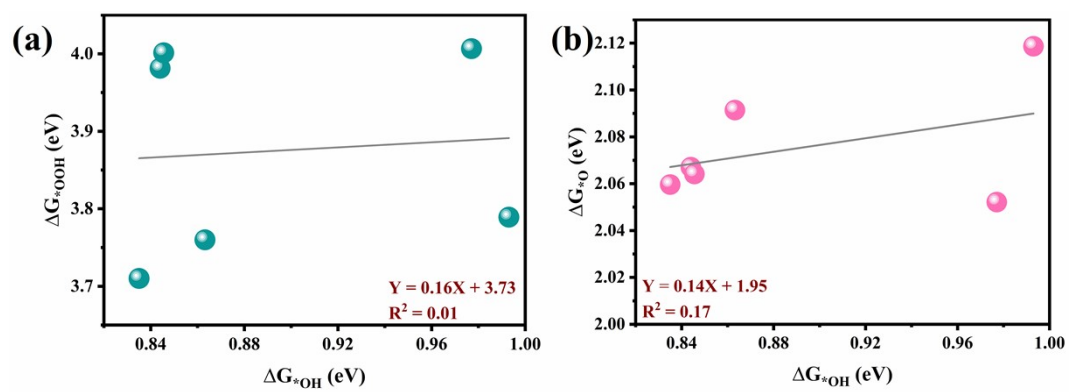

**Fig. S6.** (a) The fitting relationship of  $\Delta G^*_{OOH}$  vs.  $\Delta G^*_{OH}$ . (b) The fitting relationship of  $\Delta G^*_O$  vs.  $\Delta G^*_{OH}$ .

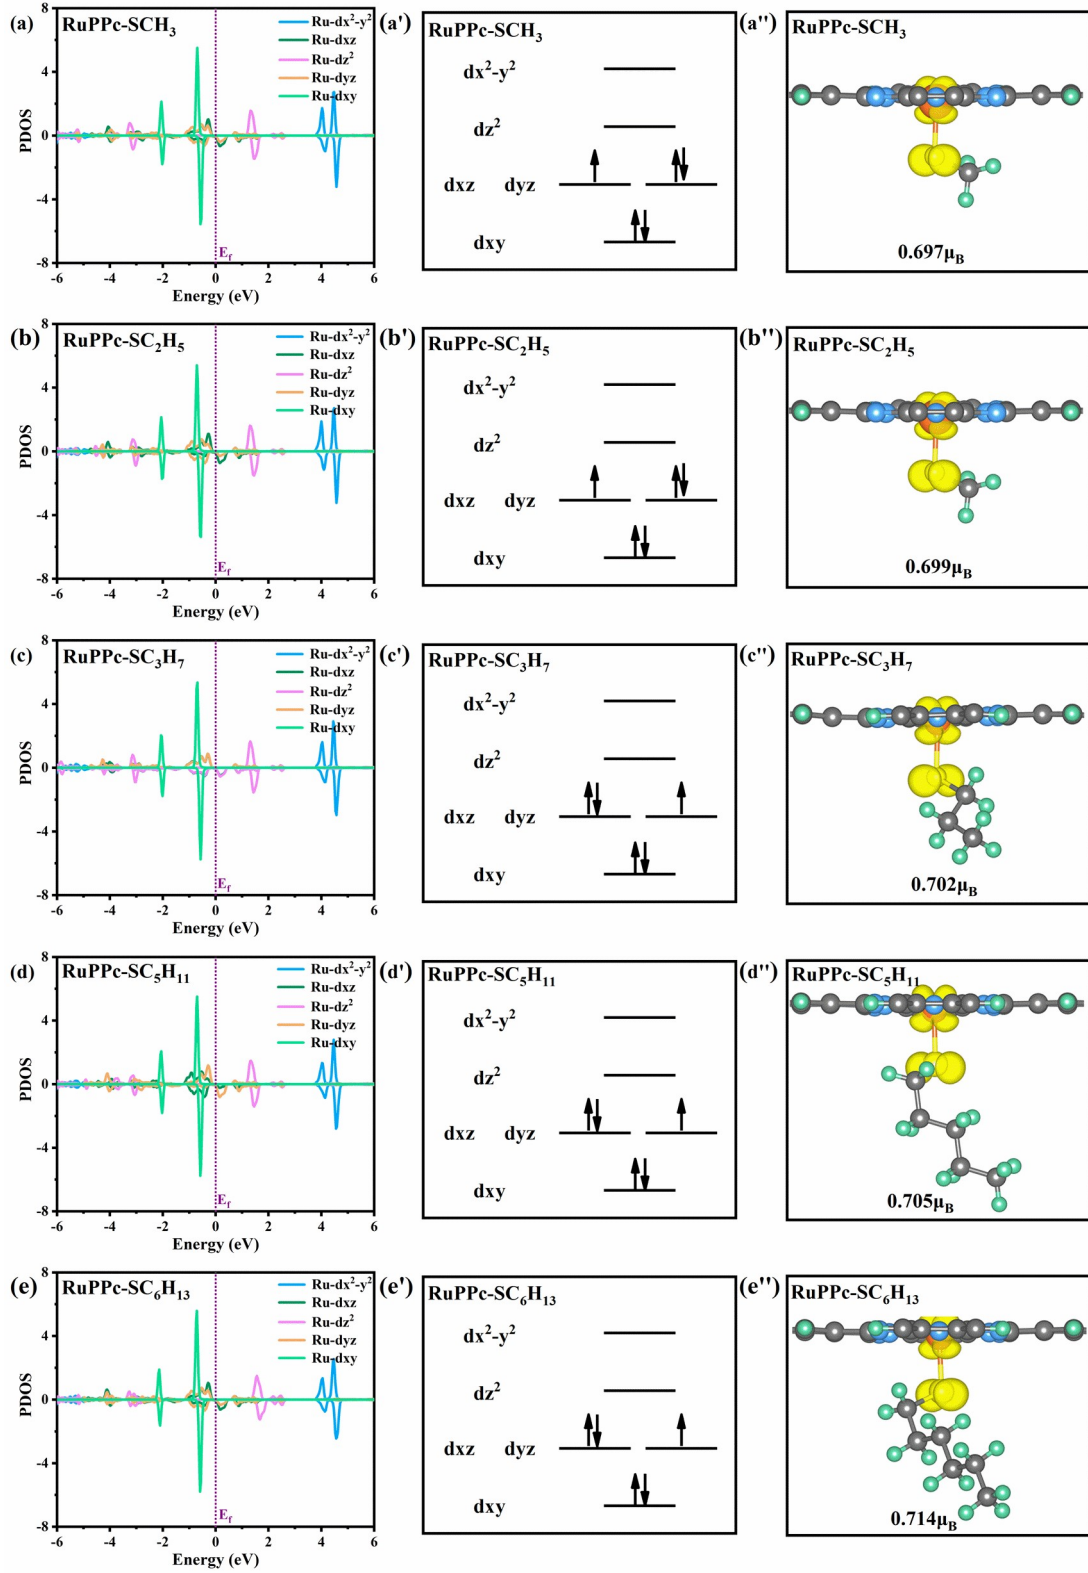

**Fig.S7.** (a)-(e) PDOS of RuPPc-SR. The vertical purple dotted line represents the Fermi level. (a')-(e') The electronic occupation of the five 4d orbitals of the Ru atoms RuPPc-SR. (a'')-(e'') Spin density distribution of RuPPc-SR. Yellow and turquoise iso-surfaces correspond to spin-up and spin-down density, respectively. The iso-surface levels are  $0.002 \text{ e}/\text{\AA}^3$ .  $M_{\text{Ru}}$  denotes the magnetic moment (unit:  $\mu_{\text{B}}$ ) of the Ru atoms in RuPPc-SR.

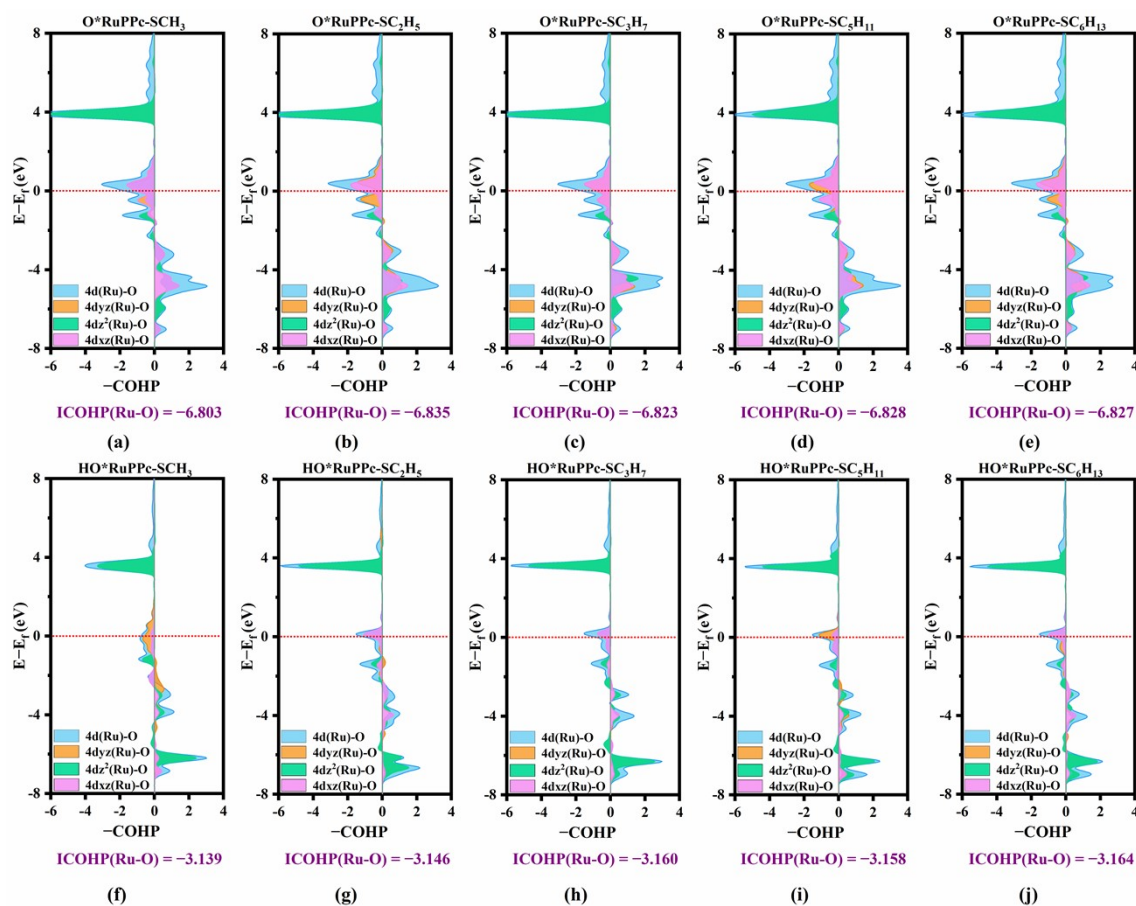

**Fig. S8.** (a)-(e) Crystal orbital Hamilton population (COHP) of the Ru-O bond in \*O of RuPPc and RuPPc-SR, respectively. (f)-(j) Crystal orbital Hamilton population (COHP) of the Ru-O bond in \*OH of RuPPc and RuPPc-SC<sub>4</sub>H<sub>9</sub>, respectively. ICOHP(Ru-O) is the integrated COHP of Ru-O bond. The horizontal red dotted line represents the  $E_f$ . The positive and the negative contributions denote the bonding states and anti-bonding states, respectively.

## References:

1. A. K. Singh, L. Zhou, A. Shinde, S. K. Suram, J. H. Montoya, D. Winston, J. M. Gregoire and K. A. Persson, *Chemistry of Materials*, 2017, **29**, 10159-10167.
2. A. S. Dobrota, N. V. Skorodumova, S. V. Mentus and I. A. Pašti, *Electrochimica Acta*, 2022, **412**, 140155.
3. I. A. Pašti, A. Jovanović, A. S. Dobrota, S. V. Mentus, B. Johansson and N. V. Skorodumova, *Physical Chemistry Chemical Physics*, 2018, **20**, 858-865.
